# Supplementary material
Source: Royal Society of Chemistry journal article supplement (doi:10.1039/d5nj04818d)
Supplement: d5nj04818d1.pdf [file d5nj04818d1.pdf]

## Supplementary Information

### **Tuning Hydrazine Reduction Parameters to Engineer Porous rGO Hydrogel Electrodes for High-Performance Supercapacitors**

**Shristi Sahu, Arya Chandran, Sudhakaran Moopri Singer Pandiyarajan, Smita Mohanty, Balasubramaniam Saravanakumar\***

*School for Advanced Research in Petrochemicals (SARP) - Laboratory for Advanced Research in Polymeric Materials (LARPM), Central Institute of Petrochemicals Engineering & Technology (CIPET), Bhubaneswar-751024, Odisha, India.*

\*Corresponding Author

**Email:** [mbsaravanakumar@gmail.com](mailto:mbsaravanakumar@gmail.com); [kumar@cipet.gov.in](mailto:kumar@cipet.gov.in) (Balasubramaniam Saravanakumar)

**Tel:** +91-674-2740173; **Fax:** +91-674-2740463

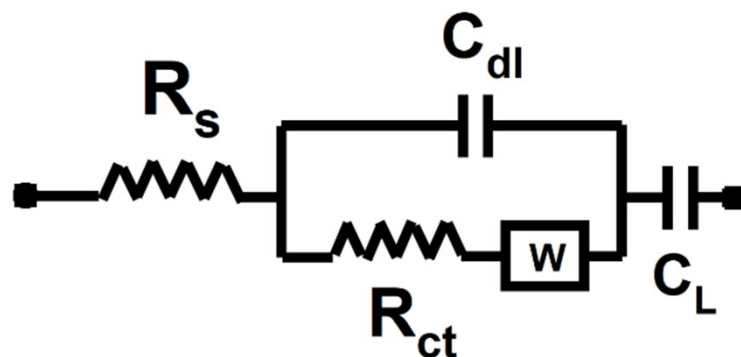

$$\text{Randles Equivalent circuit} = R_s + C_{dl} / (R_{ct} + W) / C_L$$

**Figure S1.** Modified Randles circuit used for impedance fitting, incorporating  $R_s$  (solution resistance), a parallel combination of  $C_{dl}$  and  $R_{ct}$  (double layer capacitance and charge transfer resistance), Warburg diffusion element (W), and an additional capacitance ( $C_L$ ) representing interfacial film and low-frequency capacitive behavior.

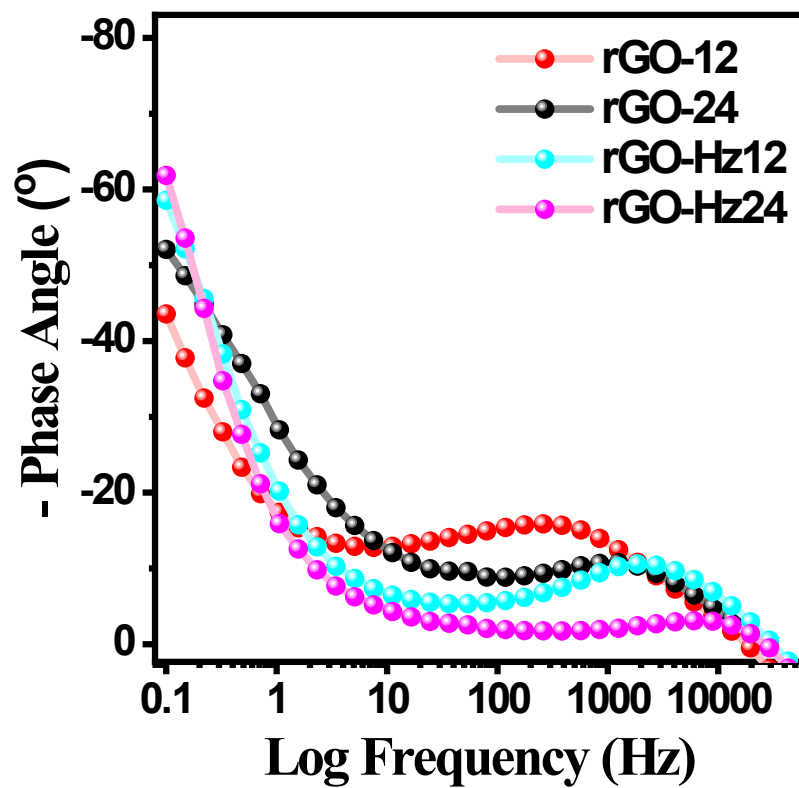

**Figure S2.** Bode phase angle plots ( $-\text{phase angle}$  vs.  $\log$  frequency) of *rGO*, *rGO-24*, *rGO-Hz12*, and *rGO-Hz24* electrodes.

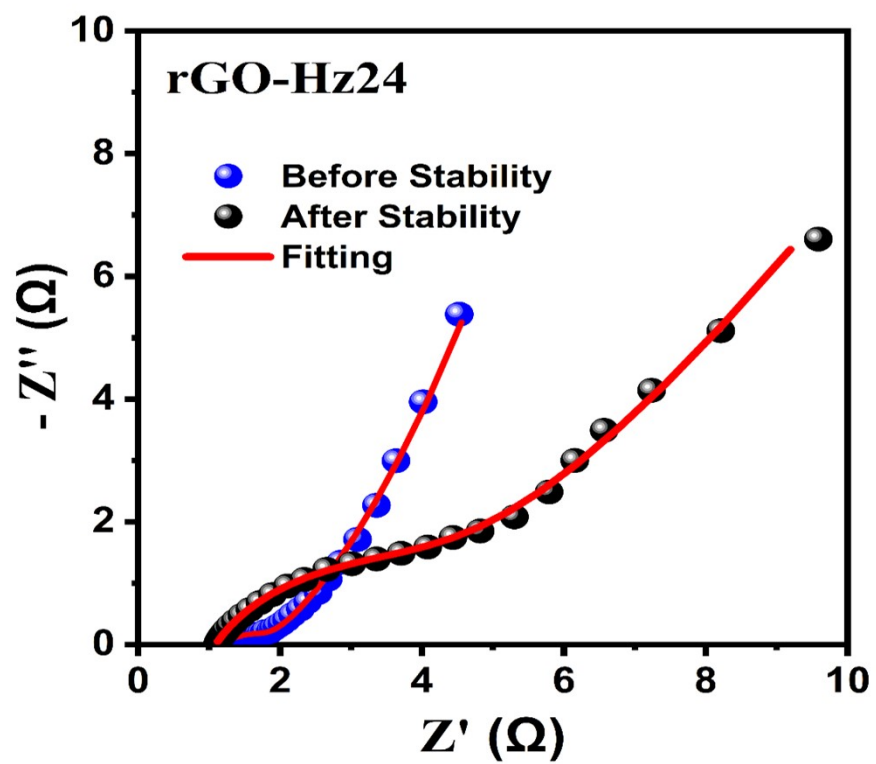

**Figure S3.** Nyquist plots of electrochemical impedance spectra (EIS) for *rGO-Hz24* electrode measured before and after stability cycling.
